# Supplementary material
Source: PubMed Central journal article supplement (PMC7415705)
Supplement: NIHMS1609212-supplement-Supplementary_Material.pdf [file NIHMS1609212-supplement-Supplementary_Material.pdf]

## Supplementary Materials

Impaired mesocorticolimbic connectivity underlies increased mechanical pain sensitivity  
in chronic low back pain

Siyi Yu<sup>1</sup>, Wen Li<sup>2</sup>, Wei Shen<sup>1</sup>, Robert R. Edwards<sup>3</sup>, Randy L. Gollub<sup>1</sup>, Georgia Wilson<sup>1</sup>, Joel Park<sup>1</sup>,  
Ana Ortiz<sup>1</sup>, Jin Cao<sup>1</sup>, Jessica Gerber<sup>4</sup>, Ishtiaq Mawla<sup>1</sup>, Suk-Tak Chan<sup>4</sup>, Jeungchan Lee<sup>4</sup>, Ajay D.  
Wasan<sup>5</sup>, Vitaly Napadow<sup>4</sup>, Ted J. Kaptchuk<sup>6</sup>, Bruce Rosen<sup>4</sup>, Jian Kong<sup>1,4</sup>

<sup>1</sup>Department of Psychiatry, Massachusetts General Hospital, Harvard Medical School, Charlestown, MA,  
USA

<sup>2</sup>Department of Psychology, Florida State University, Tallahassee, FL, USA

<sup>3</sup>Department of Anesthesiology, Perioperative and Pain Medicine, Brigham and Women's Hospital, Harvard  
Medical School, Boston, MA, USA

<sup>4</sup>Department of Radiology, Martinos Center for Biomedical Imaging, Massachusetts General Hospital,  
Harvard Medical School, Charlestown, MA, USA

<sup>5</sup>Department of Anesthesiology, Center for Pain Research, University of Pittsburgh, Pittsburgh, PA, USA

<sup>6</sup>Beth Israel Deaconess Medical Center, Harvard Medical School, Boston, MA, USA

### Correspondence to:

Jian Kong,

Department of Psychiatry,

Massachusetts General Hospital,

Charlestown, MA 02129

E-mail: [jkong2@mgh.harvard.edu](mailto:jkong2@mgh.harvard.edu)

**Table S1. Medication usage in cLBP group**

| <b>Medication</b>              | <b>Number of patients</b> |
|--------------------------------|---------------------------|
| Opioid analgesics <sup>a</sup> | 6                         |
| Benzodiazepines <sup>b</sup>   | 3                         |
| Muscle relaxants <sup>c</sup>  | 5                         |

Notes:

<sup>a</sup> Oxycodone, 5mg, TID; Hydrocodone, 5mg, PRN or TID; Tramadol, 50mg, TID or PRN; Percocet, 10mg, TID or PRN.

<sup>b</sup> Lorazepam, 1-3mg, PRN; clonazepam, 0.5mg, PRN, Valium, 10mg, PRN.

<sup>c</sup> Flexeril/Cyclobenzaprine, 5-10mg, TID.

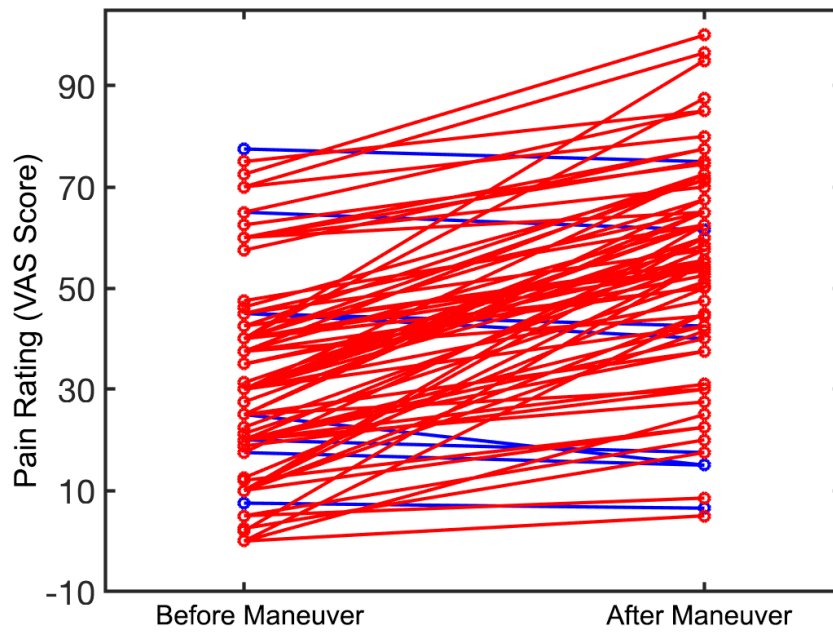

**Supplementary Figure 1. Pain ratings before and after manipulation for each patient**
